# Supplementary material for: Magnetostructural studies of copper(ii)–verdazyl radical complexes
Source: Royal Society of Chemistry journal article supplement (doi:10.1039/b603624d), 2006-01-01
Supplement: b603624d.pdf [file b603624d.pdf]

# **Structural and magnetic studies of copper (II) complexes of verdazyl radicals**

Joe B. Gilroy,<sup>a</sup> Bryan D. Koivisto,<sup>a</sup> Robert McDonald,<sup>b</sup> Michael J. Ferguson,<sup>b</sup> and Robin G. Hicks<sup>\*a</sup>

<sup>a</sup> Department of Chemistry, University of Victoria, PO Box 3065, Victoria, BC, Canada, V8W 3V6. E-mail: rhicks@uvic.ca

<sup>b</sup> Crystallography Laboratory, Department of Chemistry, University of Alberta, Edmonton, Alberta, Canada, T6G 2G2

## **Supplemental Information**

### **CONTENTS**

|                                                        |           |
|--------------------------------------------------------|-----------|
| <b>NMR spectra for compound 5</b>                      | <b>S2</b> |
| <b>EPR spectrum of compound 4</b>                      | <b>S4</b> |
| <b>Details of magnetic modeling for 4, 6, 8, and 9</b> | <b>S5</b> |
| <b>References</b>                                      | <b>S7</b> |

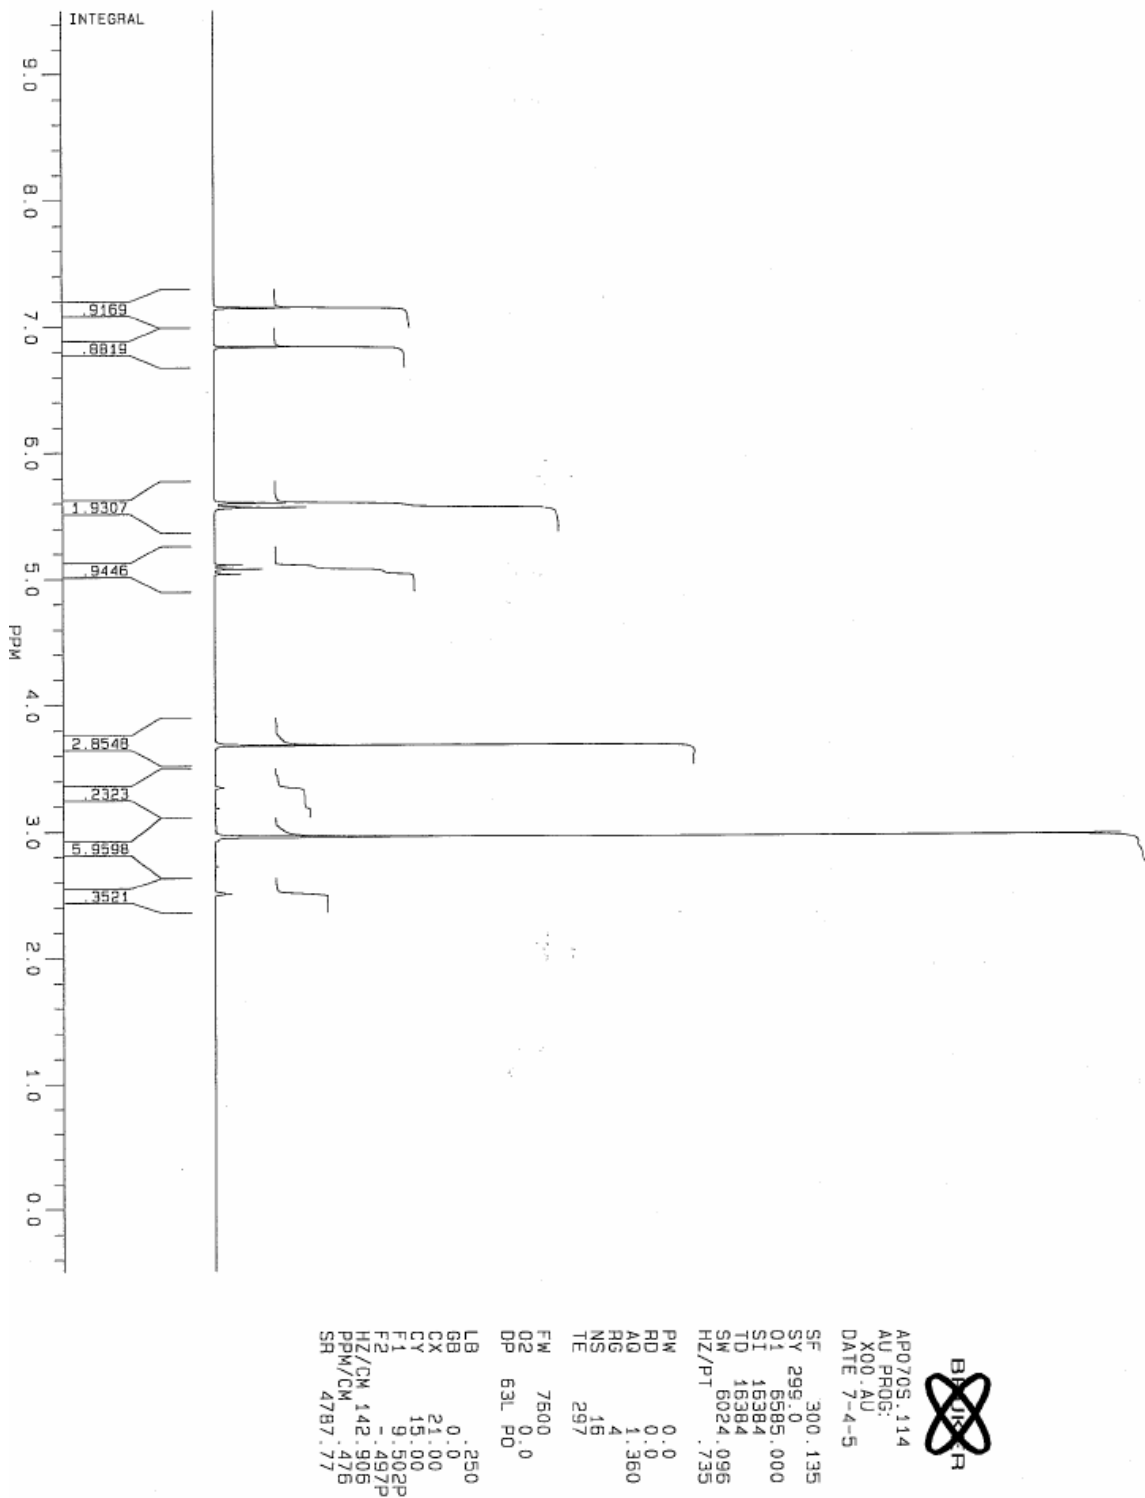

Figure S1.  $^1\text{H}$  NMR of **5** in  $d_6$ -DMSO

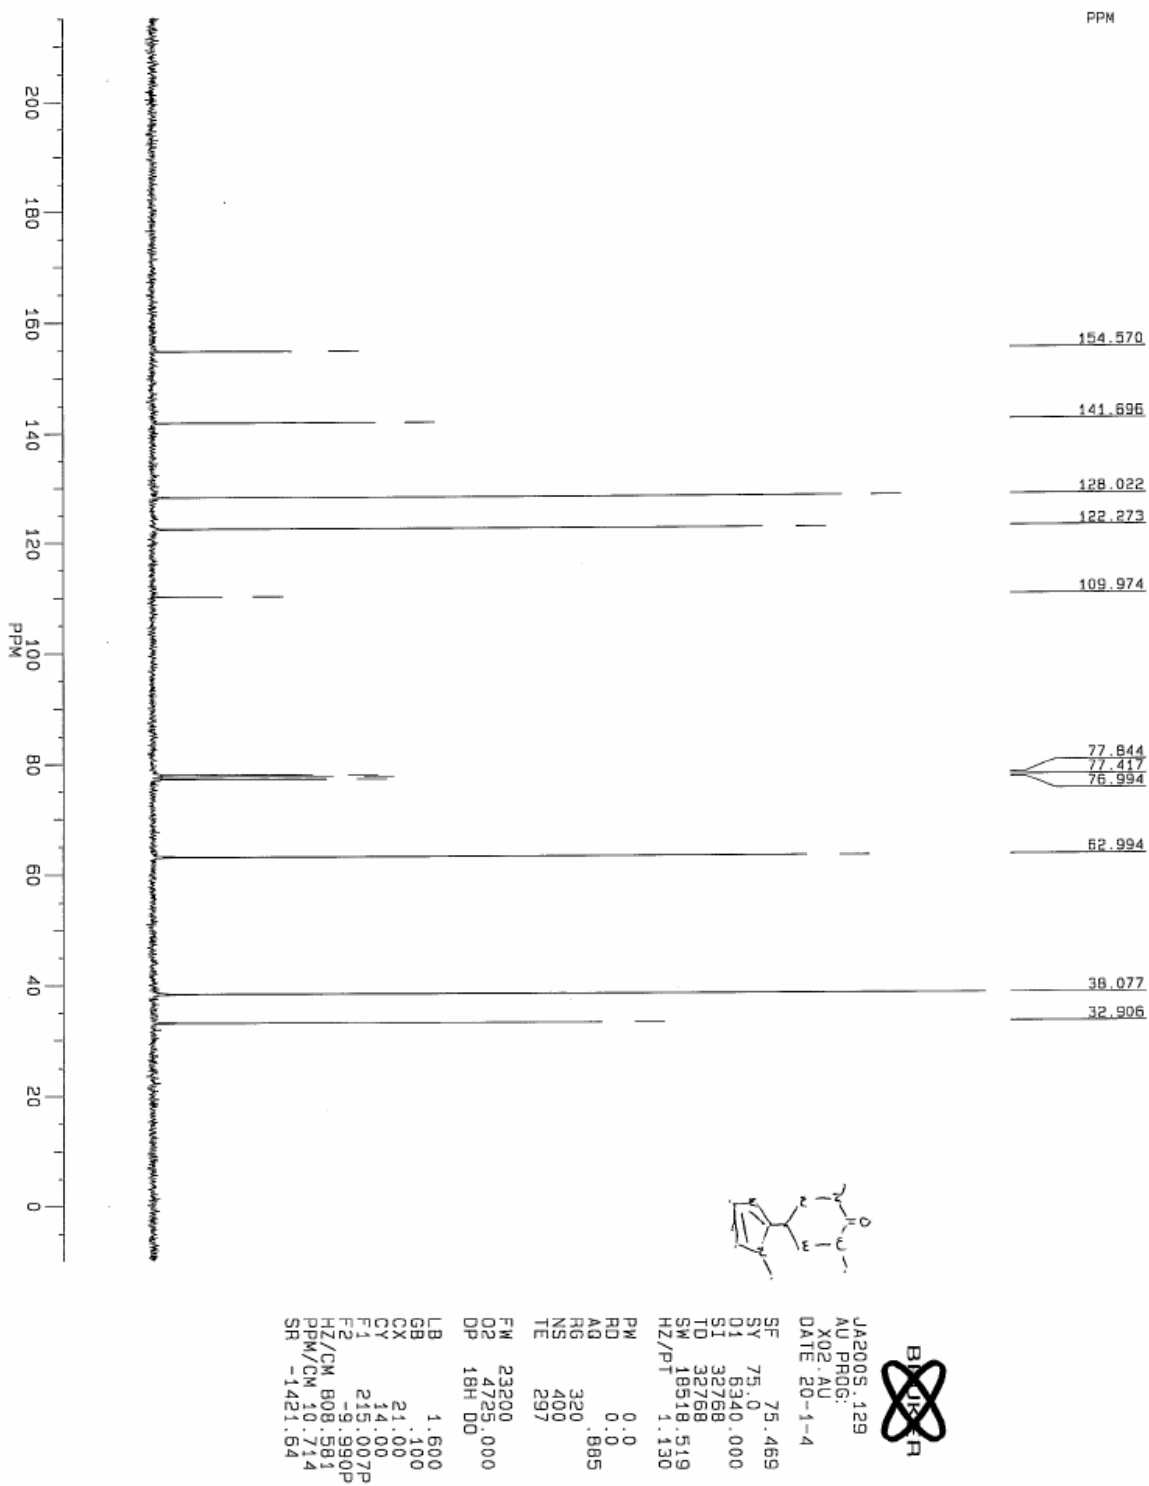

**Figure S2.**  $^{13}\text{C}$  NMR of **5** in  $\text{CDCl}_3$

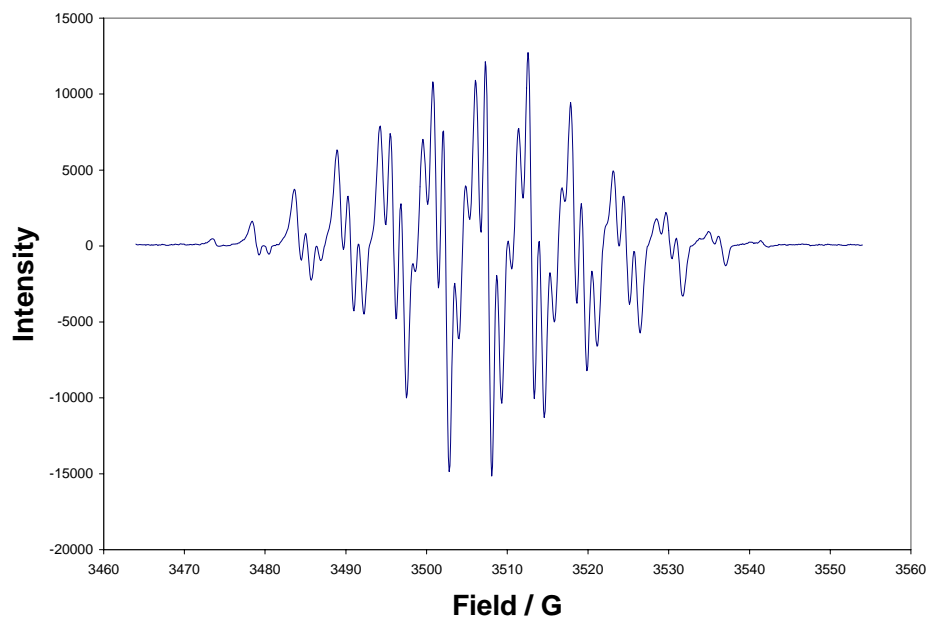

**Figure S3.** EPR of **4** in  $\text{CH}_2\text{Cl}_2$  at RT ( $g = 2.0037$ ,  $a_{\text{N}1} = 6.5$  G,  $a_{\text{N}2} = 5.3$  G,  $a_{\text{H}} = 5.3$  G)

### Details of Magnetic Modeling:

$$\text{Goodness of fit } R = \frac{\sum[\chi_{\text{obs}} - \chi_{\text{calc}}]^2}{\sum[\chi_{\text{obs}}]^2}$$

#### Verdazyl (**4**)

The antiferromagnetic intermolecular interactions between radicals were modeled using the Bonner-Fisher chain model<sup>1</sup> based on the following Hamiltonian.

$$\mathbf{H} = -J\sum \mathbf{S}_{\text{rad}} \cdot \mathbf{S}_{\text{rad}+1}$$

The magnetic susceptibility is thus given by:

$$\chi = \frac{Ng^2\beta^2}{kT} \frac{0.25 + 0.074975x + 0.075235x^2}{1.0 + 0.9931x + 0.172135x^2 + 0.757825x^3}$$

where  $x = |J|/kT$

Fitting of  $\chi$  with  $g = 2.00$  fixed gave  $\rho = 0.95$ ,  $J = -3.33 \text{ cm}^{-1}$  and  $R = 0.0011$ .

## Cu(2)Cl<sub>2</sub> (**6**)

The antiferromagnetic intramolecular interaction in complex **6** was modeled using the Bleaney-Bowers dimer model<sup>2</sup> based on the following Hamiltonian.

$$\mathbf{H} = -J\mathbf{S}_{\text{Cu}}\mathbf{S}_{\text{rad}}$$

The magnetic susceptibility is thus given by:

$$\chi = \frac{2Ng^2\beta^2}{kT[3 + \exp(-J/kT)]}$$

The interdimer interactions observed in the crystal structure of **6** were accounted for using a molecular field correction.<sup>3</sup>

$$\chi' = \frac{\chi}{1 - (2zJ'/Ng^2\beta^2)\chi}$$

A term for a Curie-Weiss impurity was also incorporated to yield an expression similar to that found above. Fitting of  $\chi T$  with  $g = 2.1$  fixed gave values  $\rho = 0.97$ ,  $J = -203.99 \text{ cm}^{-1}$ ,  $2zJ' = -520.95 \text{ cm}^{-1}$ , and  $\theta = -2.31 \text{ K}$ ,  $R = 0.011$ .

## Cu(pyvd)(hfac)<sub>2</sub> (**8**)

An analogous approach was taken to that of compound **6**. Fitting of  $\chi T$  with  $g = 2.1$  fixed gave values  $\rho = 0.99$ ,  $J = 5.00 \text{ cm}^{-1}$ ,  $2zJ' = -7.57 \text{ cm}^{-1}$ ,  $\theta = 1.50 \text{ K}$ , and  $R = 0.0011$ . The value of  $J$  was optimized by first fitting a truncated portion of the data, removing the high and low temperature linear portions of the data. It should be noted that the exact value of  $J$  has little impact on the overall curvature, and values between  $2$  and  $10 \text{ cm}^{-1}$  can be used to model this data effectively.

**Cu(NMe-imdvd)(hfac)<sub>2</sub> (9)**

A four-spin model<sup>4</sup> was employed based on the following spin arrangement:

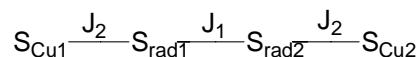

The corresponding Hamiltonian is as follows:

$$\mathbf{H} = -2J_1 \mathbf{S}_{rad1} \cdot \mathbf{S}_{rad2} - 2J_2 (\mathbf{S}_{rad1} \cdot \mathbf{S}_{Cu1} + \mathbf{S}_{rad2} \cdot \mathbf{S}_{Cu2})$$

The related expression for susceptibility is given by:

$$\chi = \frac{Ng^2 \beta^2}{kT} \frac{A}{B}$$

$$A = 10\exp(-E_1/kT) + 2\exp(-E_2/kT) + 2\exp(-E_3/kT) + 2\exp(-E_4/kT)$$

$$B = 5\exp(-E_1/kT) + 3[\exp(-E_2/kT) + \exp(-E_3/kT) + \exp(-E_4/kT)] + \exp(-E_5/kT) + \exp(-E_6/kT)$$

$$E_1 = -J_2 - J_1/2$$

$$E_2 = J_2 - J_1/2$$

$$E_3 = J_1/2 + (J_2^2 + J_1^2)^{1/2}$$

$$E_4 = J_1/2 - (J_2^2 + J_1^2)^{1/2}$$

$$E_5 = J_2 + J_1/2 + (4J_2^2 - 2J_2J_1 + J_1^2)^{1/2}$$

$$E_6 = J_2 + J_1/2 - (4J_2^2 - 2J_2J_1 + J_1^2)^{1/2}$$

A second term was once again introduced in order to account for paramagnetic impurities displaying Curie-Weiss impurity. It should also be noted that our data was based on molecular units containing two spins rather than a true four spin system, therefore the expression for  $\chi$  was multiplied by one half. The overall equation used to model susceptibility was:

$$\chi' = (\rho) \frac{Ng^2 \beta^2}{2kT} \frac{A}{B} + (1 - \rho) \frac{2Ng^2 \beta^2}{k(T - \Theta)}$$

Fitting of  $\chi T$  with  $g = 2.1$  fixed gave values  $\rho = 0.95$ ,  $J_1 = -39.51 \text{ cm}^{-1}$ ,  $J_2 = 6.06 \text{ cm}^{-1}$ ,  $\theta = 0.59 \text{ K}$ , and  $R = 0.00058$ . The curvature from 25-150 K shows dependence on  $J_1$  almost exclusively with the value of  $J_2$  and  $\theta$  having a larger influence on the low temperature data. It should be noted that  $J_2$  has little impact on the overall curvature, and values between 2 and  $10 \text{ cm}^{-1}$  can be used to model this data.

## References

1. J.C. Bonner, M.E. Fisher, *Phys. Rev. A*, 1964, **135**, 640.
2. B. Bleaney, K.D. Bowers, *Proc. Roy. Soc.(London) Ser. A*, 1952, **214**, 451.
3. R. L. Carlin, *Magnetochemistry*, Springer-Verlag: New York, 1986; p133.
4. Z. Liu, L. Li, D. Liao, Z. Jiang, S. Yan, *Cryst. Growth Des.*, 2005, **5**, 783.; Z. Liu, Z. Lu, D. Zhang, Z. Jiang, L. Li, C. Liu, D. Zhu., *Inorg. Chem.*, 2004, **43**, 6620.
